# Supplementary material for: Long noncoding RNA NRON contributes to HIV-1 latency by specifically inducing tat protein degradation
Source: PubMed Central journal article supplement (PMC4909936; doi:10.1038/ncomms11730), 2016-06-13
Supplement: ncomms11730-s1.pdf [file ncomms11730-s1.pdf]

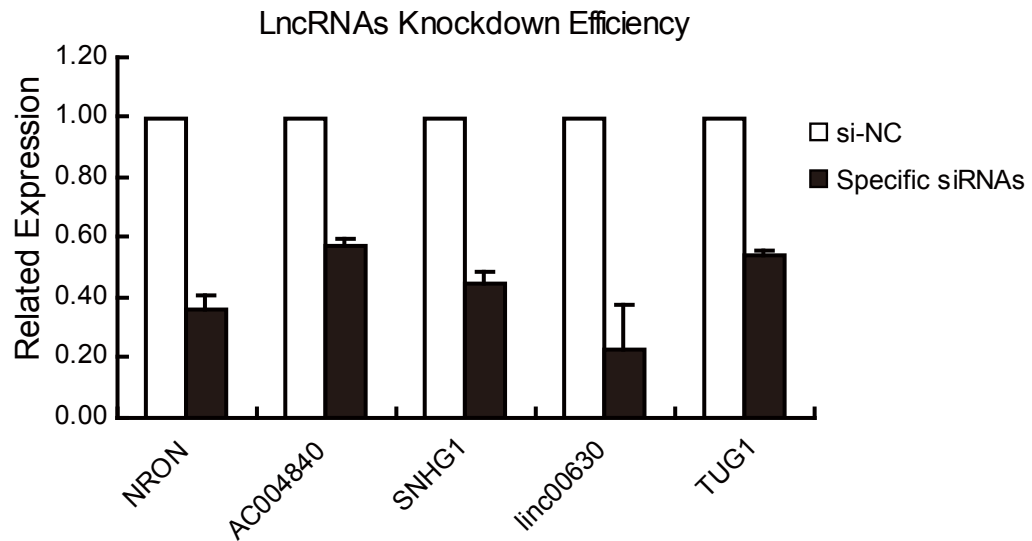

Supplementary Figure 1

Supplementary Figure 1 Knockdown of lncRNAs by siRNAs pools. The lncRNAs knockdown efficiency was detected by real-time qRT-PCR in the activated primary CD4<sup>+</sup> T lymphocytes (n=3). The results show mean  $\pm$  S.D. (error bars).

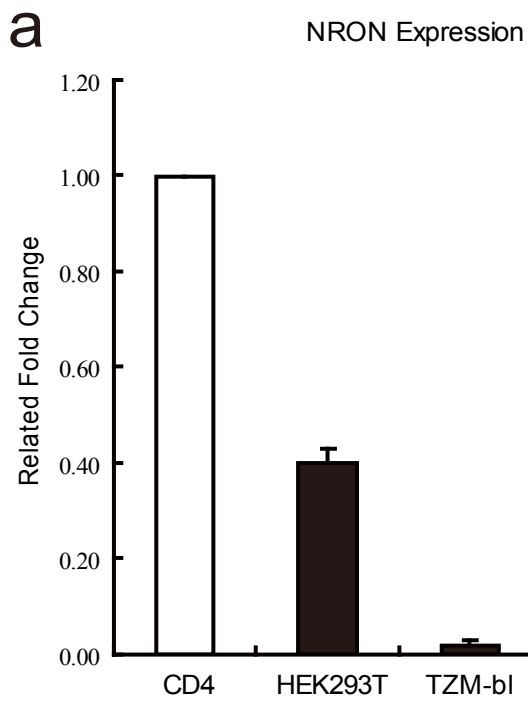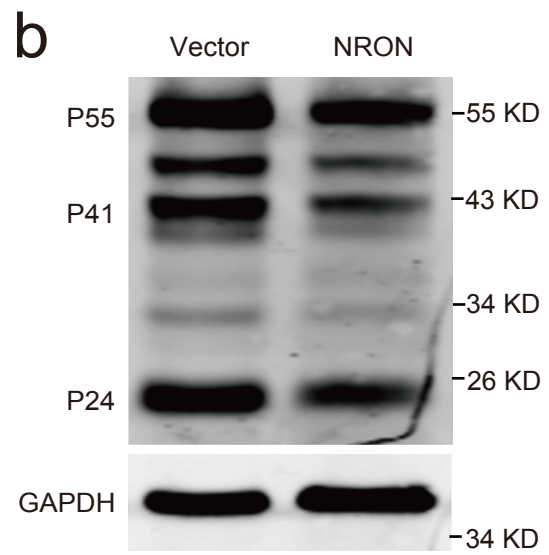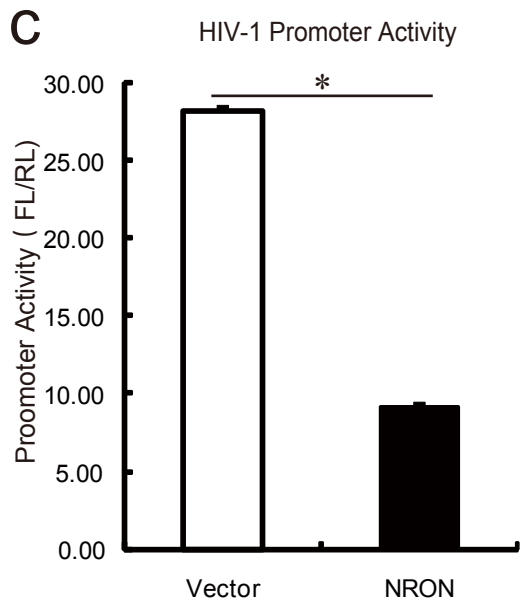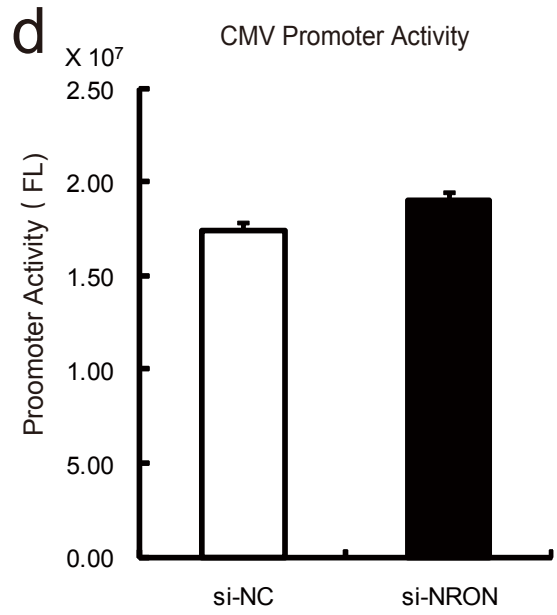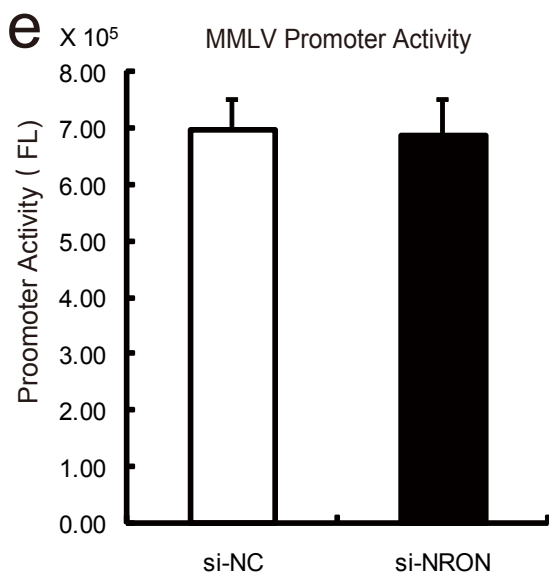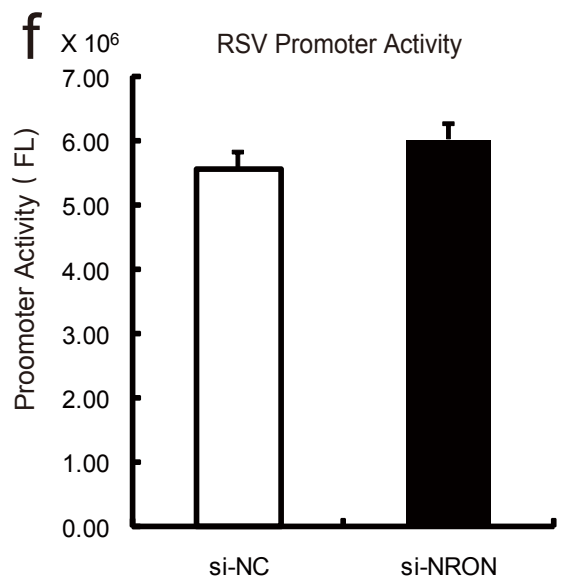

Supplementary Figure 2

**Supplementary Figure 2 NRON specifically inhibits HIV-1 promoter activity.** (a) NRON expression level in activated primary CD4<sup>+</sup> T lymphocytes, HEK293T, TZM-bl and HeLa cells was detected by real-time qRT-PCR. The expression of NRON in activated primary CD4<sup>+</sup> T lymphocytes was normalized as 1 (n=3). (b) HeLa cells were co-transfected with pNL4-3-deltaE-EGFP plasmids and NRON-expressing plasmid pcDNA3.1-NRON or empty vector control. Gag proteins expression was determined by western blotting with anti-p24 primary antibody at 72 h after transfection. (c) pcDNA3.1-Tat-HA, pRL-CMV and pcDNA3.1-NRON, or empty vector were co-transfected into TZM-bl cells, and at 48 h after transfection the integrated HIV-1 promoter activity was determined by dual-luciferase assay (n=3). (d-f) CMV, MMLV, or RSV promoter activities were examined upon NRON knockdown by luciferase reporter assay (n=3). Data in **a**, **c-f** show mean  $\pm$  S.D. (error bars). Results in **b** represent three independent experiments. \*  $P < 0.05$ , Student's unpaired *t* test.

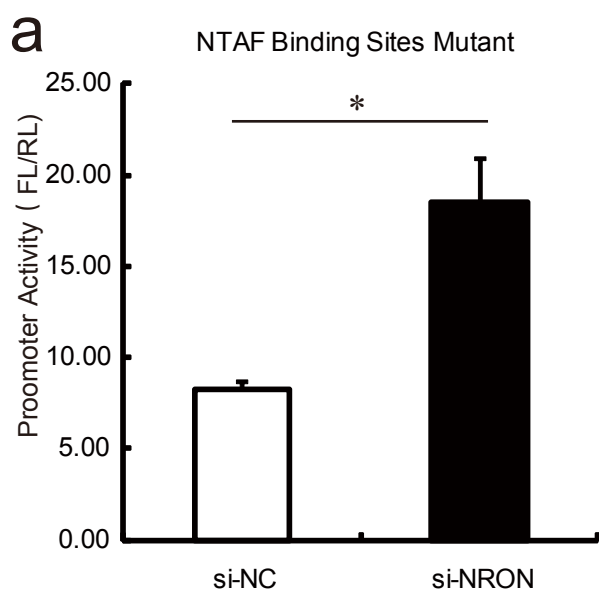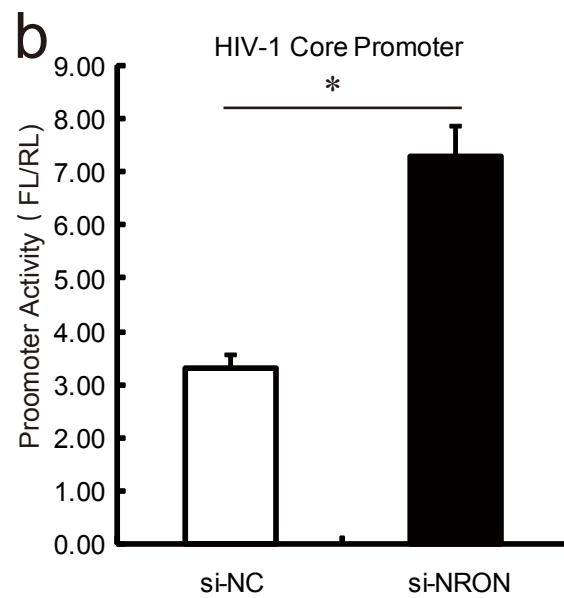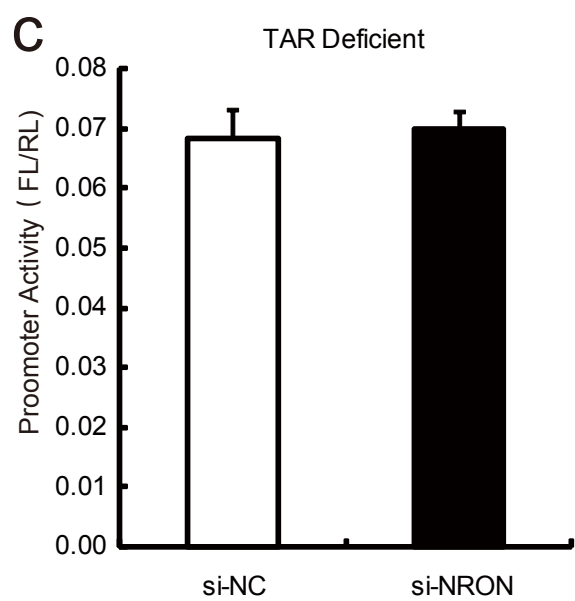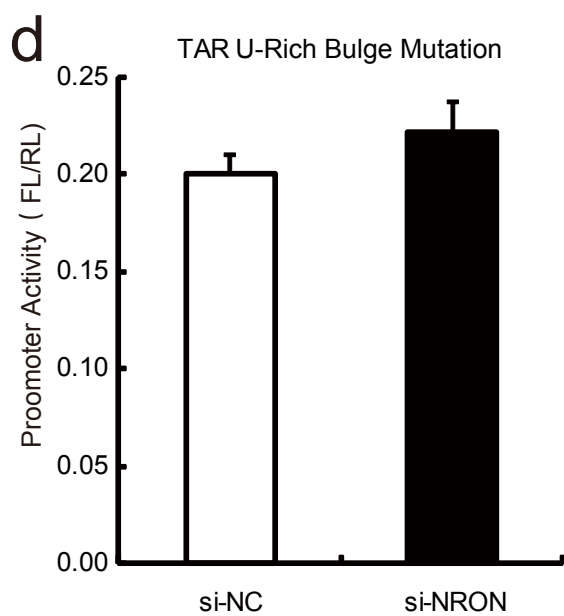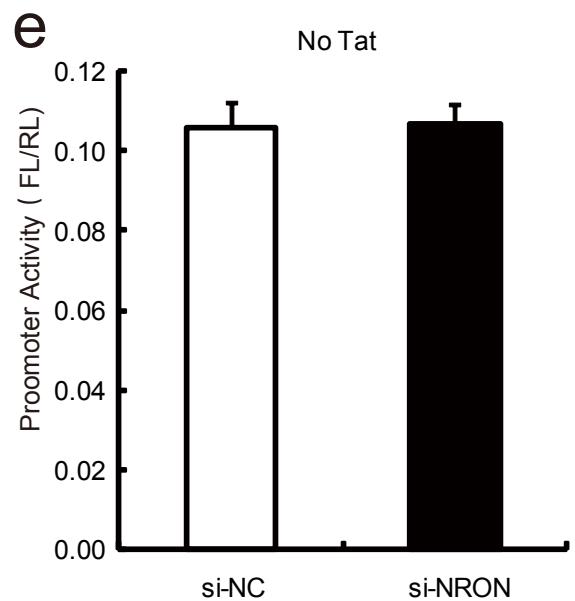

Supplementary Figure 3

**Supplementary Figure 3 NRON targets the HIV-1 Tat/TAR axis.** The activities of HIV-1 NFAT binding sites mutated promoter (**a**) or core promoters (**b**) were determined by dual-luciferase reporter assay in HEK293T cells upon NRON depletion. The activities of TAR element deficient (**c**) or Tat binding U-rich bulge mutated (**d**) HIV-1 promoters were measured by dual-luciferase reporter assay. (**e**) HIV-1 promoter activity was determined upon NRON knockdown without co-transfection of the Tat-expressing plasmid pcDNA3.1-Tat-HA in HEK293T cells. The results show mean  $\pm$ S.D. (error bars) from triplicate samples. \*  $P < 0.05$ , Student's unpaired  $t$  test.

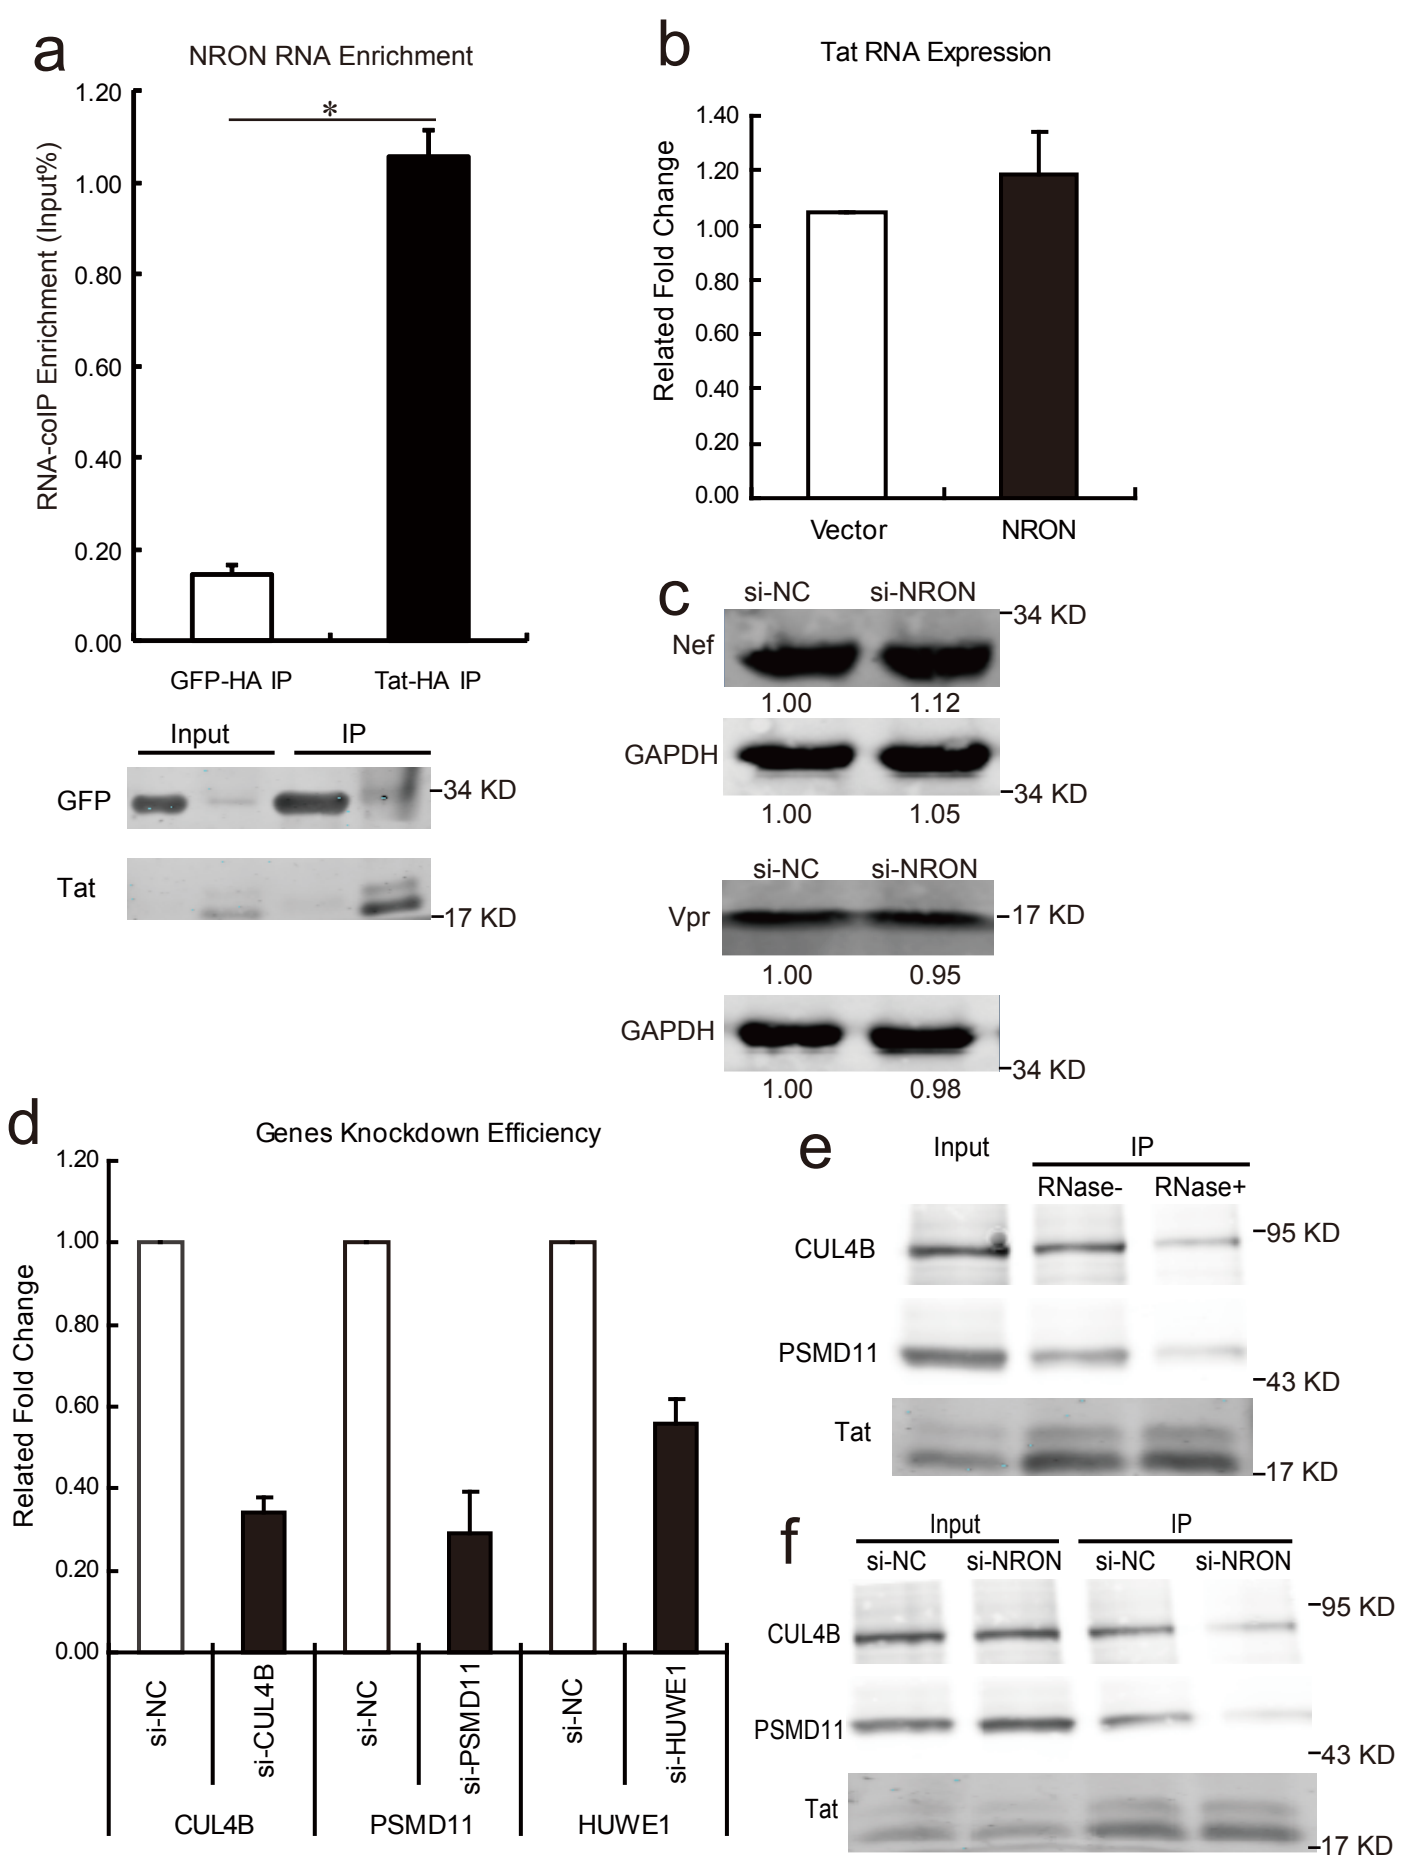

Supplementary Figure 4

**Supplementary Figure 4 NRON recruits Tat to the ubiquitin/proteasome system. (a)**

Endogenous RNA was co-immunoprecipitated by Tat in HEK293T cells, the enriched NRON RNA was determined by real-time qRT-PCR (n=3), and the precipitated proteins were detected by western blotting. **(b)** The pcDNA3.1-NRON or empty vector were co-transfected with pcDNA3.1-Tat-HA into TZM-bl cells, and Tat RNA level was detected by real-time qRT-PCR (n=3). **(c)** Nef and Vpr were detected by western blotting upon NRON knockdown in HEK293T cells. Numbers indicated the fold change related to control. **(d)** Knockdown efficiency of CUL4B, PSMD11, and HUWE1 was confirmed by real-time qRT-PCR (n=3). **(e)** The ectopic expressed CUL4B and PSMD11 in HEK293T cells were co-immunoprecipitated by Tat. The precipitates were washed with RNase-free or RNase A containing washing buffer and the enriched CUL4B or PSMD11 were detected by western blotting. **(f)** SiRNAs against NRON or non-specific control and pcDNA3.1-Tat-HA were co-transfected into Flag-tagged CUL4B or PSMD11-expressing HEK293T cells, and then CUL4B or PSMD11 were co-immunoprecipitated by Tat and detected by western blotting. Data in **a**, **b** and **d** show mean  $\pm$  S.D. (error bars). Results in **c**, **e** and **f** represent three independent experiments. \*  $P < 0.05$ , Student's unpaired *t* test.





**Supplementary Figure 5 HIV-1 latency models.** (a) The *bcl-2* gene was inserted into the *nef* region of pNL4-3-deltaE-EGFP. (b) Schematic representation of generating the modified *in vitro* latency model with primary CD4<sup>+</sup> T lymphocytes. (c) Western blotting detection of Bcl-2 in the activated human primary CD4<sup>+</sup> T lymphocytes infected by pNL4-3-deltaE-EGFP-Bcl-2 pseudotyped viruses. After cultured for approximately 1 month (d), or then reactivated by anti-CD3 and anti-CD28 antibodies stimulation for 48 h (e), the status of the pseudotyped viruses infected primary CD4<sup>+</sup> T lymphocytes were confirmed by FACS. NRON knockdown efficiency was detected in the primary CD4<sup>+</sup> T lymphocytes *in vitro* latency model (f) and resting CD4<sup>+</sup> T lymphocytes isolated from HIV-1 infected individuals (h). (g) Alu-PCR confirmation of the integrated HIV-1 provirus in the resting CD4<sup>+</sup> T lymphocytes isolated from HIV-1 infected individuals receiving suppressive cART. (i) Resting CD4<sup>+</sup> T lymphocytes isolated from HIV-1 infected individuals on suppressive cART were transfected with control or NRON-specific siRNAs. After 48 h, HIV-1 virion associated RNAs in the supernatants were isolated and detected by real-time qRT-PCR. Results in c, d, e and g represent three independent experiments. Data in f, h and i show mean ± S.D. (error bars).

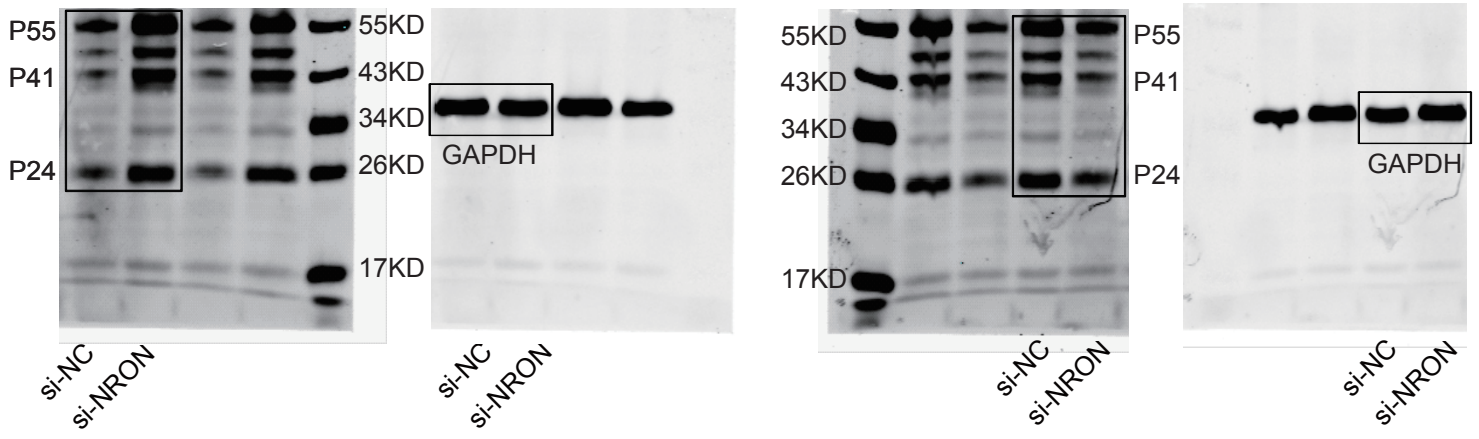

Fig 2a

Supplementary Fig 2b

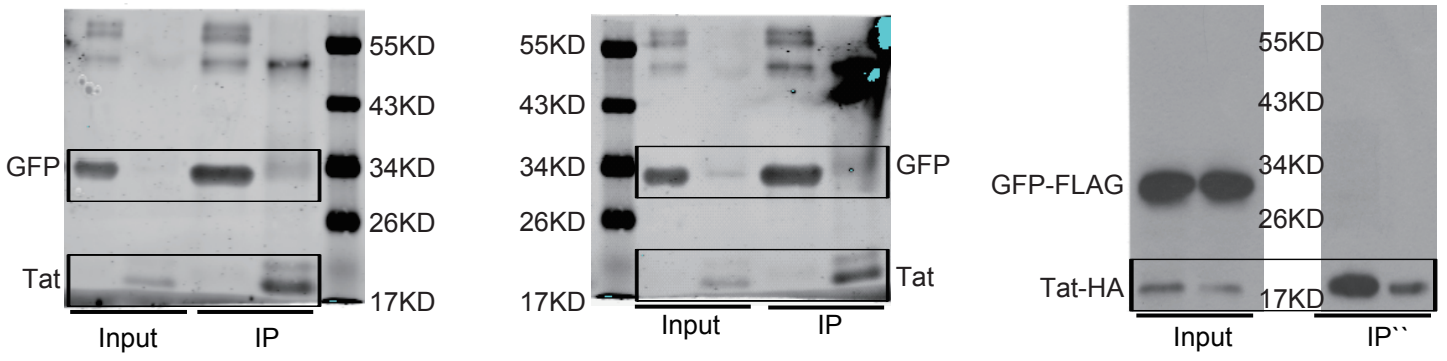

Fig 2d

Supplementary Fig 4a

Fig 2e

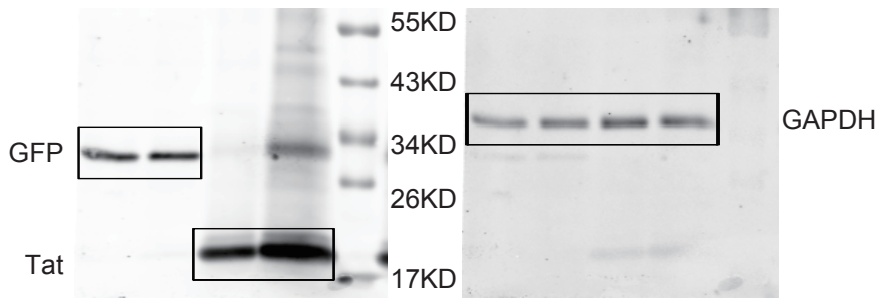

Fig 2f

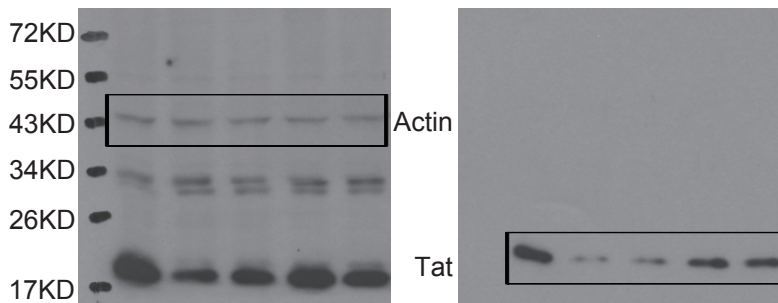

Fig 3b

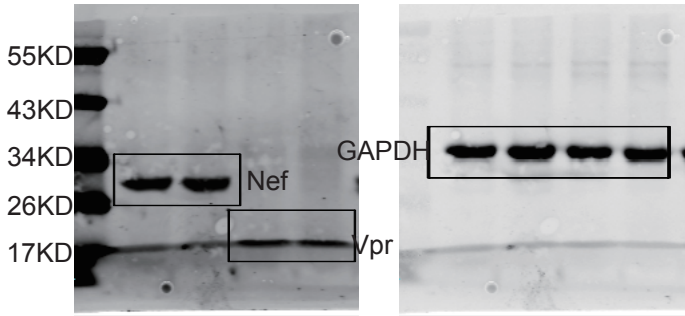

Supplemrntary Fig 4c

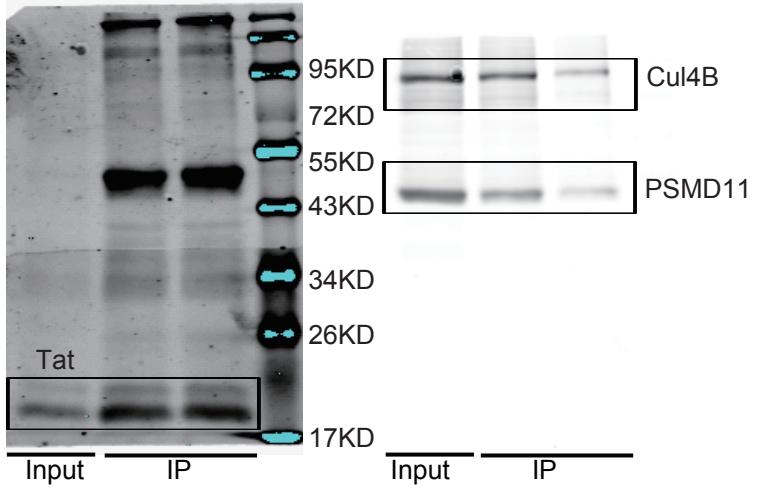

Supplemrntary Fig 4e

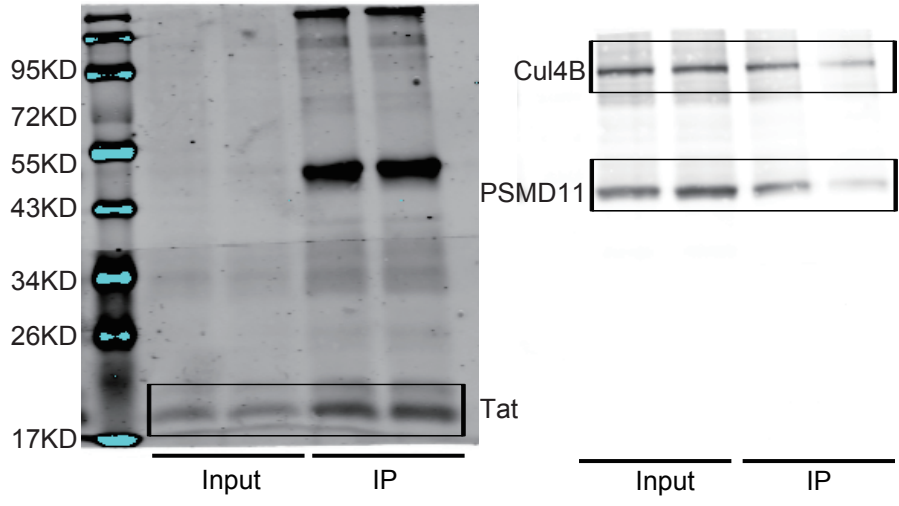

Supplemrntary Fig 4f

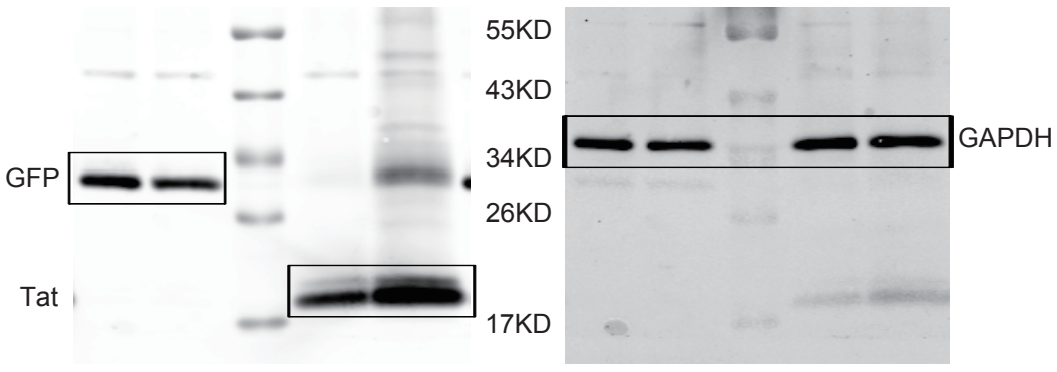

Fig 4b

**Supplementary Figure 6 Uncropped blots scans used in the manuscript.** Boxes indicate approximate portions of the films that are included in the figures. Below the blots it is indicated to which figure they correspond.

### Supplementary Table 1

| Table S1 Primer sets for constructs and primers for site direct mutations or deletions on HIV-1 Promoter (Red characters indicate the mutated sites) |                                            |                                           |                                                          |
|------------------------------------------------------------------------------------------------------------------------------------------------------|--------------------------------------------|-------------------------------------------|----------------------------------------------------------|
| Constructs or mutants                                                                                                                                | Forward                                    | Reverse                                   | Description                                              |
| pHIV-Pro-Luc                                                                                                                                         | CGGGGTACCTGGAAGGGCTAATTTGGTCCCA            | CGCGGATCCTGCTAGAGATTTTCCCACTGA            | Full length of HIV-1 NL4-3 5' LTR sequence               |
| pcDNA3.1-NRON                                                                                                                                        | AGCCCAAGCTTCACATCTCTAATGTAAACAACCCAGC      | CGGGGTACCGGAAAAAATTTCTCCTTAACTATTTT       | Full length of human NRON sequence                       |
| pHIV-Pro-mNFAT-1                                                                                                                                     | GACTTTGAGCTGGGGACTTTGAAGGGAGGTGTGGCCTGGGCG | TCAAAGTCCCCAGCTCAAAGTCCCTTGTAGAAAGCT      | nt 351 to 380: 5'-GGACTTTGAGCTGGGGACTTTGAAGGGAGG-3'      |
| pHIV-Pro-mNFAT-2                                                                                                                                     |                                            | CGCGGATCCTGCTAGAGATTTAGAACACTGACTAAAGGGTC | nt 607 to 634: 5'-TTTTAGTCAGTGTCTAAATCTCTAGCA-3'         |
| pHIV-Pro-Core                                                                                                                                        | CGGGGTACCGGGAGGTGTGGCCTGGGCGGGACT          | CGCGGATCCGGGTCCCTAGTTAGCCAGAGAGC          | nt 374 to 513 of HIV-1 NL4-3 5' LTR sequence             |
| pHIV-Pro-dTAR                                                                                                                                        | GGTCTCTCTGGTTAGTCTGGCTAACTAGGGAACCC        | TCCCTAGTTAGCCAGACTAACCAGAGAGACCCAGTAC     | Deletion of nt 470 to 492 of HIV-1 NL4-3 5' LTR sequence |
| pHIV-Pro-dTAR/mU                                                                                                                                     | GGTTAGACCAGAACAGAGCCTGGGAGCTCTCTGGC        | AGAGCTCCCAGGCTCTGTTCTGGTCTAACCAGAGAGA     | nt 466 to 489: 5'-TTAGACCAGAACAGAGCCTGGGAG-3'            |
| pMMLV-Pro-Luc                                                                                                                                        | CGGGGTACCAATGAAAGACCCACCTGTAGG             | CGCGGATCCAATGAAAGACCCCGCTGACG             | Full length of MMLV Promoter sequence                    |
| pRSV-Pro-Luc                                                                                                                                         | CGGGGTACCCTGCTCCCTGCTTGTGTGTTG             | CGCGGATCCGGTGCACACCAATGTGGTGAA            | Full length of RSV Promoter sequence                     |
| Tat exon 1                                                                                                                                           | CGCGGATCCGCCACCATGGAGCCAGTAGATCCTAGACT     | GGGATTGGGAGGTGGGTTGCTTTGATAGAGAACTTGATG   |                                                          |

|                          |                                                                     |                                                                           |                                                                                                            |
|--------------------------|---------------------------------------------------------------------|---------------------------------------------------------------------------|------------------------------------------------------------------------------------------------------------|
| Tat exon 2               | TTCTCTATCAAAGCAACCCACCTCCCAATCCCGAG<br>GGGAC                        | CCGCTCGAGCTAGGCGTAGTCGGGCACGTCGTAGG<br>GGTAATCGAATGGATCTGTCTCTG           | With HA epitope sequence<br>tagged at the C' terminus                                                      |
| pcDNA3.1-CU<br>L4B-FLAG  | <b>CGCGGATCCGCCACCATGATGTCACAGTCATCTGGAT</b>                        | CCGCTCGAGTTACTTGTTCATCGTCATCCTTGTAATCT<br>CCACCTGCAATATAGTTGTACTGGTTTGGAT | Full length of human CUL4B<br>cDNA sequence with FLAG<br>epitope sequence tagged at the<br>C' terminus     |
| pcDNA3.1-PS<br>MD11-FLAG | <b>CGCGGATCCGCCACCATGGCTGCAGCGGCGGTGGTGGAGTT</b>                    | CCGCTCGAGTTACTTGTTCATCGTCATCCTTGTAATCT<br>CCACCTGTCAGTTTCTTGGCTTTGTTGTAG  | Full length of human PSMD11<br>cDNA sequence with FLAG<br>epitope sequence tagged at the<br>C' terminus    |
| pFLAG-Ub                 | CGGAATTCGCCACCATGGATTACAAGGATGACGA<br>TGACAAGATGCAGATCTTCGTGAAAACCC | <b>TGCTCTAGATAACCACCTCTCAGACGCAGG</b>                                     | Full length of human ubiquitin<br>cDNA sequence with FLAG<br>epitope sequence tagged at the<br>C' terminus |

### Supplementary Table 2

| Table S2 Target Sequences of siRNAs against lncRNAs used in the study |                     |                      |                     |
|-----------------------------------------------------------------------|---------------------|----------------------|---------------------|
| lncRNA                                                                | Target Sequence 1   | Target Sequence 2    | Target Sequence 3   |
| NRON                                                                  | CTGTTTCCACTACTGCTCC | ATCATTAGGCTAATAACGC  | ATACTGTTTCCACTACTGC |
| AC004840                                                              | GCACCTTGGAGATGTCATT | GGACAGAGTGCAAGGACAT  |                     |
| SNHG1                                                                 | GCCAGCACCTTCTCTCTAA | GAGGACATCAGAAGGTGAA  |                     |
| linc00630                                                             | GCTTCTACTCCTGACTTAA | GCGGTATACAACCACACTA  |                     |
| TUG1                                                                  | CCTCAAGCCAAATAGCTAA | GCCTCTATTCCCTGTATGTA |                     |

### Supplementary Table 3

| Table S3 Primer sets for real-time RT-PCR used in the study |                           |                           |
|-------------------------------------------------------------|---------------------------|---------------------------|
| Gene or lncRNA name                                         | Forward                   | Reverse                   |
| Beta-actin                                                  | GCATGGAGTCCTGTGGCA        | CAGGAGGAGCAATGATCTTGA     |
| GAPDH                                                       | CGCTCTCTGCTCCTCCTGTT      | CCATGGTGTCTGAGCGATGT      |
| NRON                                                        | ACGTTCCCTAATGTACGCCTTTGC  | TTGGCCGTGTCTGAGTCCTT      |
| LINC00489                                                   | CCTGCTCGATGCACCTCT        | CACAGTCCCTGCCGTCTT        |
| AC004840                                                    | AGACCCCATACAGCAGCGACCA    | CACGCTGACCCGAAATCCTCCA    |
| RP11-86H7                                                   | TGCCTCATTATCCCCGGATGCCT   | TGACACTCCCAGGACTTGACAAAGC |
| RP11-62I21                                                  | ATGGAACAGAGGTGGCTACGGTC   | GAACCGTCATGGCTGCTTTGAGGA  |
| SNHG6                                                       | GAGCCGTTAGTCATGCCGGTGT    | GCTCAATACATGCCGCGTGATCCT  |
| SNHG1                                                       | TGCCTCCCAGGGTGAATACAGGT   | AGAGAGAAGGTGCTGGCCCTTTG   |
| SCAND2                                                      | CAGAAAACGTCCAGTGCAGGTGGG  | GTGCCACCTGCTTCTCAAGTCCTG  |
| RP11-67K19                                                  | CCCCAGAACAATGCTGGAGGCAA   | AGCAGGCCATTTGTCCAGTGAGAGA |
| LINC00900                                                   | GGGAAGTGCCAGGATGGGGTATCA  | TCAACCTGGTTCACCTCCAGGCGAA |
| LINC00502                                                   | AGTAGCAGGCTTGGGGACGTTTTTC | TGGTGCTGTCACTTCACACTGCTTG |
| RP11-418J17                                                 | ACACTGCCCCATCTTGAATCGCC   | ACACCAGTCACCTTAGCGGCAC    |
| LINC00426                                                   | TTCTGCAGCCTCCCTTGTTAGCCA  | AACTGTTGCGACATTGTTGCGGG   |
| LINC00630                                                   | TAACCCAGTGCCTCGTATGGTGCC  | GGAATCAGGCATCACATCCCACCA  |
| AP000402                                                    | ATCCAGGCCTGCTTTGGATGTCTT  | AAGGGCGTGTACAATCAAGGCAGT  |
| LINC00491                                                   | TCAGCCCATCACGAGGTTGCTT    | AGACCTTTGGCTCTTTTGGGGT    |
| NEAT1                                                       | CAGAGCCCATGAATGCCAGCAG    | ACGCACAAGAAGGCAGGCAAACA   |
| THAP7-AS                                                    | GTTAGTAAGCGGCGCGAGCGTG    | CATCGTGCCGGGGTGTTTACGG    |
| Gas5                                                        | TCTTGCCACCCAAGCTAGAG      | TTGTGCCATGAGACTCCATCAG    |
| TUG1                                                        | TAGCAGTTCCCAATCCTTG       | CACAAATTCCCATCATTTCC      |
| T-bet                                                       | TGGTTGGGGAAGTGGGGCTCAA    | TGCTCCCATGTCCCACACCTGA    |
| Firefly Luciferase                                          | CAACACCCCAACATCTTCGACGC   | GGACTTTCGCCCTTCTTGGCCTT   |

|                              |                                        |                                         |
|------------------------------|----------------------------------------|-----------------------------------------|
| HIV-1 total mRNA (Nef-3'LTR) | GGTGGGTTTTCCAGTCACACCTCAG              | GCACCATCCAAAGGTCAGTGG                   |
| HIV-1 Tat                    | CGCGGATCCGCCACCATGGAGCCAGTAGATCCTAGACT | GGGATTGGGAGGTGGGTTGCTTTGATAGAGAACTTGATG |
| CUL4B                        | CCCCTCCCCGAGGCTCTTAATTCT               | CCACGTACACAGGGAAAAGAGCACA               |
| PSMD11                       | GGGCTTCCAAGCAAGTCCAGACA                | ACTGGACCATGCTGCCCTGGAA                  |
| HUWE1                        | GCCCTCGAAGGCATGAATGGCA                 | GCCAACAGTAGCATGTGGCGGA                  |
